# Supplementary material for: Effects of habitat amount and fragmentation per se on mammals in a highly fragmented Colombian region
Source: Research Square preprint supplement (doi:10.21203/rs.3.rs-7294977/v1), 2025-11-12
Supplement: Supplementary file 1 [file 8ba79d8d2cc53e50d2f188c8.docx]

# Supplementary material

**
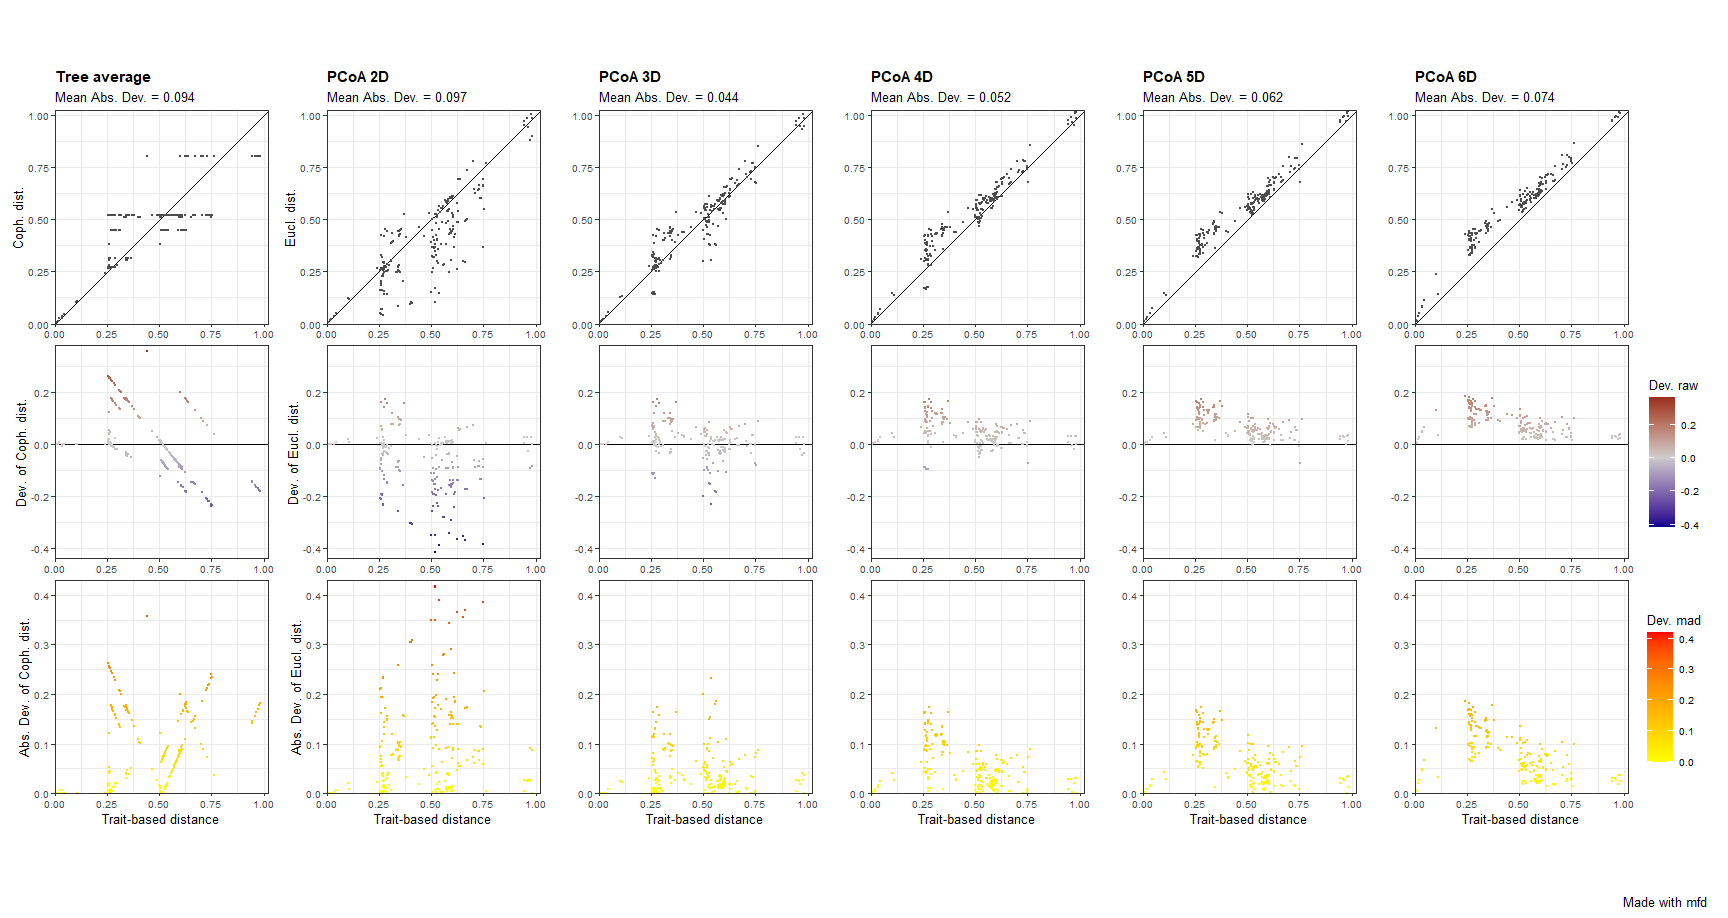
**

**Figure S1.** Quality of functional spaces and UPGMA dendrogram with a single plot with three panels for each space. Each column represents a functional space and the x-axis of all panels represents trait-based distances. The y-axis is different for each row: in the first row, it represents the functional distances of species in multidimensional space; in the second row, it shows the raw deviation of species distances in functional space compared to trait-based distances; and in the third row, it shows the absolute or squared deviation of distance ('scaled') in functional space.

**Table S1**. Akaike Information Criteria (AIC) of the variables forest cover (FC), number of patches (NP), mean patch area (PS) and edge density (ED) analyzed in relation to total species richness, forest-dependent species richness, non-forest-dependent species richness and functional richness of medium- to large-bodied mammals in the Colombian Caribbean. In bold, the lowest AIC values and the selected scale are highlighted.

|  |  | **Species richness** | **Forest-dependent** | **Non-forest-dependent** | **Functional richness** |
| --- | --- | --- | --- | --- | --- |
| **Variable** | **Scale (km)** | **AIC** | **AIC** | **AIC** | **AIC** |
|  | 0.5 | 176.45 | 136.09 | 145.47 | -33.78 |
|  | 1 | 176.62 | 137.06 | **143.78** | -33.47 |
| **FC** | 2 | 176.49 | 135.98 | 145.21 | -33.58 |
|  | 4 | 175.85 | 134.95 | 146.25 | **-34.20** |
|  | 6 | **175.71** | **134.37** | 146.27 | -34.13 |
|  | 0.5 | 176.50 | 137.68 | 146.00 | -33.36 |
|  | 1 | 176.58 | 136.70 | **142.75** | -33.04 |
| **NP** | 2 | 176.31 | 136.76 | 146.11 | -33.83 |
|  | 4 | 175.45 | **134.83** | 146.51 | -33.70 |
|  | 6 | **175.16** | 135.02 | 146.58 | **-33.96** |
|  | 0.5 | 176.62 | 137.27 | 144.94 | -33.49 |
|  | 1 | 176.63 | 135.35 | **142.69** | -33.46 |
| **PS** | 2 | 176.37 | 135.71 | 145.58 | -33.98 |
|  | 4 | **175.43** | **133.87** | 146.40 | **-34.17** |
|  | 6 | 175.49 | 134.63 | 146.46 | -33.96 |
|  | 0.5 | **173.41** | **139.30** | **142.08** | **-34.10** |
|  | 1 | 175.71 | 139.73 | 145.20 | -33.13 |
| **ED** | 2 | 175.53 | 139.43 | 145.51 | -33.40 |
|  | 4 | 176.41 | 139.82 | 145.81 | -33.09 |
|  | 6 | 176.54 | 139.81 | 146.51 | -33.06 |

**Table S2.** Variance Inflation Factor (VIF) of the analyzed variables. **a**. Includes the variables forest cover (FC), number of patches (NP), mean patch area (PS) and edge density (ED). **b.** Includes the variables forest cover (FC), number of patches (NP) and edge density (ED).

| **Species richness** | | |
| --- | --- | --- |
| **Variable** | **VIF a** | **VIF b** |
| **FC** | 8.78226 | 3.097019 |
| **NP** | 6.952472 | 3.101056 |
| **PS** | 19.21299 |  |
| **ED** | 1.351447 | 1.036109 |
| **Forest-dependent** | | |
|  | **VIF a** | **VIF b** |
| **FC** | 28.737091 | 2.403799 |
| **NP** | 46.262708 | 2.84313 |
| **PS** | 122.449441 |  |
| **ED** | 1.284248 | 1.289931 |
| **Non-forest-dependent** | | |
|  | **VIF a** | **VIF b** |
| **FC** | 15.221271 | 1.558295 |
| **NP** | 32.877821 | 1.826241 |
| **PS** | 70.267162 |  |
| **ED** | 1.325663 | 1.325652 |
| **Functional Richness** | | |
|  | **VIF a** | **VIF b** |
| **FC** | 11.050424 | 1.363097 |
| **NP** | 10.507206 | 1.263711 |
| **PS** | 30.939902 |  |
| **ED** | 1.406398 | 1.13426 |
|  |  |  |

**Table S3.** Values of the residual autocorrelation test based on Moran's I, values of the overdispersion test based on Pearson's residuals for the residuals of all fitted GLM models. Test results are expressed as p-values. Significant values are in bold.

| **Global model** | **Moran´s I (p-value)** | **Moran´s I index** | **Overdispersion test** |
| --- | --- | --- | --- |
| Landscape structure analysis: |  |  |  |
| Y ~ FC+ NP+ ED |  |  |  |
| Y: |  |  |  |
| Richness species | 0.23 | 0.26 | 0.42 |
| Forest-dependent | 0.91 | -0.06 | 0.28 |
| Non-forest-dependent | **0.021** | **0.39** | 0.92 |
| Functional richness | 0.21 | 0.05 |  |

**Table S4.** The models of the eight possible combinations of explanatory variables plus the null models and the corresponding AIC values, (FC) forest cover, (ED) edge density and (NP) number of patches.

| **Model** |  |  |  |  |  |  |  |  |  |
| --- | --- | --- | --- | --- | --- | --- | --- | --- | --- |
| **Species richness** | **(Intercept)** | **FC** | **ED** | **NP** | **df** | **logLik** | **AICc** | **ΔAIC** | ***ωi*** |
| ED+NP | 2.66794 |  | 0.09686 | -0.19994 | 3.00000 | -81.15433 | 169.10865 | 0.00000 | 0.42362 |
| ED | 1.66054 |  | 0.08520 |  | 2.00000 | -82.68296 | 169.75301 | 0.64436 | 0.30694 |
| FC+ED | 0.42261 | 0.14236 | 0.09518 |  | 3.00000 | -81.60680 | 170.01359 | 0.90494 | 0.26944 |
| **Forest Dependent** |  |  |  |  |  |  |  |  |  |
| FC | -1.48657 | 0.31715 |  |  | 2.00000 | -63.35354 | 131.09418 | 0.00000 | 0.34526 |
| ED+NP | 2.41960 |  | 0.09707 | -0.34646 | 3.00000 | -62.51489 | 131.82978 | 0.73559 | 0.23901 |
| NP | 2.27206 |  |  | -0.24454 | 2.00000 | -63.78872 | 131.96453 | 0.87035 | 0.22344 |
| FC+NP | -1.93277 | 0.34785 | 0.06169 |  | 3.00000 | -62.73243 | 132.26486 | 1.17068 | 0.19228 |
| **Non-forest dependent** |  |  |  |  |  |  |  |  |  |
| ED | 0.79726 |  | 0.14067 |  | 2.00000 | -66.99876 | 138.38462 | 0.00000 | 0.41111 |
| NP | 0.92395 |  |  | 0.18978 | 2.00000 | -67.68879 | 139.76467 | 1.38005 | 0.20620 |
| FC+ED | 1.46530 | -0.12041 | 0.12192 |  | 3.00000 | -66.54684 | 139.89368 | 1.50906 | 0.19331 |
| ED+NP | 0.73597 |  | 0.10596 | 0.10326 | 3.00000 | -66.56739 | 139.93477 | 1.55015 | 0.18938 |
| **Functional Richness** |  |  |  |  |  |  |  |  |  |
| NULL | 0.15267 |  |  |  | 2.00000 | 19.44328 | -34.45800 | 0.00000 | 0.38470 |
| FC | -0.16290 | 0.04085 |  |  | 3.00000 | 20.10043 | -33.31197 | 1.14602 | 0.21690 |
| ED | 0.10494 |  | 0.01564 |  | 3.00000 | 20.04992 | -33.21094 | 1.24705 | 0.20622 |
| NP | 0.35317 |  |  | -0.03835 | 3.00000 | 19.97941 | -33.06993 | 1.38807 | 0.19218 |
|  |  |  |  |  |  |  |  |  |  |

**Table S5.** Coefficients of the best models: (CA) forest cover, (ED) edge density and (NP) number of patches.

|  |  |  | **Confidence intervals** | |  |
| --- | --- | --- | --- | --- | --- |
| **Richness species** | **Average model coefficients** | **Standard error** | **2.5%** | **97.5%** | **Akaike weights (ωi)** |
| (Intercept) | 1.75374095 | 1.09537 | -0.42004969 | 3.92753159 |  |
| ED | 0.092828683 | 0.0437 | 0.00377923 | 0.18187814 | 1 |
| NP | -0.199941822 | 0.1161 | -0.43673613 | 0.03685249 | 0.42 |
| FC | 0.142362354 | 0.09911 | -0.05976713 | 0.34449184 | 0.27 |
| **Forest Dependent** |  |  |  |  |  |
| (Intercept) | 0.201078213 | 2.25253 | -4.25180442 | 4.65396084 |  |
| FC | 0.328131052 | 0.15289 | 0.016673 | 0.6395891 | 0.55 |
| ED | 0.081298043 | 0.06388 | -0.0485984 | 0.21119449 | 0.43 |
| NP | -0.297218155 | 0.14276 | -0.58683985 | -0.00759646 | 0.46 |
| **Non-forest dependent** |  |  |  |  |  |
| (Intercept) | 0.940916529 | 0.46187 | 0.01093531 | 1.87089775 |  |
| ED | 0.127823349 | 0.07123 | -0.01714004 | 0.27278674 | 0.80 |
| NP | 0.148356719 | 0.11286 | -0.08042396 | 0.3771374 | 0.40 |
| FC | -0.120412241 | 0.12378 | -0.37287009 | 0.13204561 | 0.19 |
| **Functional richness** |  |  |  |  |  |
| (Intercept) | 0.112910407 | 0.24153 | -0.3518584 | 0.57767922 |  |
| FC | 0.04084567 | 0.03612 | -0.03369691 | 0.11538825 | 0.46 |
| ED | 0.015636449 | 0.01453 | -0.01408852 | 0.04536141 | 0.15 |
| NP | -0.038347031 | 0.03796 | -0.11597923 | 0.03928517 | 0.4 |
